# Supplementary material for: Highly efficient ruthenium-catalyzed asymmetric hydrogenation of N-heteroaryl vinyl ethers
Source: Royal Society of Chemistry journal article supplement (doi:10.1039/d2qo00448h), 2022-01-01
Supplement: d2qo00448h1.pdf [file d2qo00448h1.pdf]

# Highly Efficient Ruthenium-Catalyzed Asymmetric Hydrogenation of N-Heteroaryl Vinyl Ethers

Song Feng,<sup>\*†</sup> Baoqi Ren,<sup>†</sup> Lige Li,<sup>†</sup> Fengmin Xia,<sup>‡</sup> Zhiyong Tang,<sup>‡</sup> Yu Zhang,<sup>§</sup> Xiaoning Liu,<sup>§</sup> Qixuan Lu,<sup>§</sup> Wenge Zhong<sup>†</sup>

<sup>†</sup> Regor Therapeutics Group, 1206 Zhangjiang Road, Building C, Pu Dong New District, Shanghai, 201210, China

<sup>‡</sup> Pharmaron Beijing Co., Ltd. 6 Taihe Road, BDA, Beijing, 100176, China

<sup>§</sup> BioDuro-Sundia, 388 Jialilue Road, Shanghai, Zhangjiang Hi-tech Park, Shanghai, 201203, China

*KEYWORDS: Ruthenium, Asymmetric hydrogenation, vinyl ether*

## Table of Contents

|                                                                                                   |     |
|---------------------------------------------------------------------------------------------------|-----|
| 1. Experimental Section.....                                                                      | S2  |
| 2. General Procedure for the Synthesis of vinyl ether <b>3a-h</b> , <b>5a</b> , <b>7a-d</b> ..... | S2  |
| 3. General Procedure for the Asymmetric Hydrogenation <b>4a-h</b> , <b>6a</b> , <b>8c-d</b> ..... | S8  |
| 4. Experimental Data of Products.....                                                             | S9  |
| 5. Chiral HPLC Spectra.....                                                                       | S24 |

## Experimental Section

### General Information

Unless otherwise noted, all reagents and solvents were purchased from commercial suppliers and used without further purification. NMR spectra were recorded on Bruker ADVANCE III HD (300 MHz)/ BRUKER AVANCE NEO (400 MHz) spectrometers for  $^1\text{H}$  NMR and  $^{13}\text{C}$  NMR.  $\text{CDCl}_3/\text{DMSO}-d_6$  was the solvent used for the NMR analysis, with tetramethylsilane as the internal standard. Chemical shifts were reported upfield to TMS (0.00 ppm) for  $^1\text{H}$  NMR and relative to  $\text{CDCl}_3$  (77.0 ppm) for  $^{13}\text{C}$  NMR. HPLC analysis was conducted on an Agilent 1260 Series instrument. Column Chromatography was performed with silica gel (Rushanshi Shuangbang Xincailiao Co., Ltd). All new products were further characterized by HRMS. A positive ion mass spectrum of sample was acquired on an Agilent 6135 mass spectrometer with an electrospray ionization source.

### General Procedure for the Synthesis of Vinyl ether substrates **3a-h**, **5a**, **7a-d**

Vinyl ether derivatives were prepared according to previously reported procedures with some modifications:

#### The synthesis of **3e** :

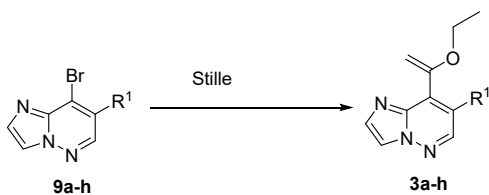

| entry | R <sup>1</sup>                        |
|-------|---------------------------------------|
| 1     | -COOEt ( <b>3a/4a</b> )               |
| 2     | -COO <sup>t</sup> Bu ( <b>3b/4b</b> ) |
| 3     | -COOMenthol ( <b>3c/4c</b> )          |
| 4     | -COOMenthol ( <b>3d/4d</b> )          |
| 5     | -NHBoc ( <b>3e/4e</b> )               |

To a solution of tert-butyl N-(8-bromoimidazo[1,2-b]pyridazin-7-yl)carbamate (**9a**, 10.36 g, 33.08 mmol) in N,N-dimethylformamide (50 mL) was added tributyl(1-ethoxyvinyl)stannane (23.90 g, 66.17 mmol, 22.33 mL) at room temperature. Then bis(triphenylphosphine)palladium(II) chloride (2.32 g, 3.31 mmol) was added under  $\text{N}_2$ . The resulting reaction mixture was stirred at 100 °C for 3 h. After the reaction was completed, the mixture was concentrated and the residue was purified by flash column chromatography (Petroleum ether: Ethyl acetate 3:1) to give tert-butyl N-[8-(1-ethoxyvinyl)imidazo[1,2-b]pyridazin-7-yl]carbamate (**3e**, 10.06 g, 99 % yield) as a yellow oil.

LC/MS:  $m/z$  305  $[\text{M}+\text{H}]^+$ .  $^1\text{H}$  NMR (400 MHz,  $\text{DMSO}-d_6$ )  $\delta$  8.96 (s, 1H), 8.71 (s, 1H), 8.19 (d,  $J = 1.3$  Hz, 1H), 7.66 (d,  $J = 1.3$  Hz, 1H), 5.27 (d,  $J = 2.5$  Hz, 1H), 4.88 (d,  $J = 2.6$  Hz, 1H), 3.93 (q,

$J = 7.0$  Hz, 2H), 1.47 (s, 9H), 1.33 (t,  $J = 6.9$  Hz, 3H);  $^{13}\text{C}$  NMR (101 MHz, DMSO)  $\delta$  153.22, 151.98, 142.48, 137.47, 133.66, 126.05, 117.04, 94.01, 80.59, 63.65, 28.41, 14.65.

**The synthesis of 3a-c, 5a is similar to 3e.**

**The characterization of 3a:**

LC/MS:  $m/z$  262  $[\text{M}+\text{H}]^+$ .  $^1\text{H}$  NMR (400 MHz, DMSO- $d_6$ )  $\delta$  8.67 (s, 1H), 8.48 (d,  $J = 1.3$  Hz, 1H), 7.95 (s, 1H), 5.32 (d,  $J = 2.7$  Hz, 1H), 4.92 (d,  $J = 2.7$  Hz, 1H), 4.31 (q,  $J = 7.1$  Hz, 2H), 3.91 (q,  $J = 7.0$  Hz, 2H), 1.31 (t,  $J = 7.1$  Hz, 3H), 1.26 (t,  $J = 7.0$  Hz, 3H).  $^{13}\text{C}$  NMR (101 MHz, DMSO- $d_6$ )  $\delta$  165.15, 151.30, 142.66, 135.61, 135.38, 132.10, 118.64, 118.03, 93.20, 63.46, 61.54, 13.91, 13.82.

**The characterization of 3b:**

LC/MS:  $m/z$  290  $[\text{M}+\text{H}]^+$ .  $^1\text{H}$  NMR (400 MHz, DMSO- $d_6$ )  $\delta$  8.67 (s, 1H), 8.45 (d,  $J = 1.1$  Hz, 1H), 7.93 (d,  $J = 1.2$  Hz, 1H), 4.92 (d,  $J = 2.8$  Hz, 1H), 4.82 (d,  $J = 2.8$  Hz, 1H), 3.93 (q,  $J = 7.0$  Hz, 2H), 1.53 (s, 9H), 1.27 (t,  $J = 7.0$  Hz, 3H).  $^{13}\text{C}$  NMR (100 MHz, DMSO- $d_6$ )  $\delta$  164.13, 152.11, 143.54, 136.33, 136.21, 133.47, 119.41, 119.09, 91.98, 82.82, 63.91, 28.04, 14.44.

**The characterization of 3c/3d:**

LC/MS:  $m/z$  372.1  $[\text{M}+\text{H}]^+$ .  $^1\text{H}$  NMR (400 MHz, DMSO- $d_6$ )  $\delta$  8.69 (s, 1H), 8.49 (d,  $J = 1.2$  Hz, 1H), 7.96 (d,  $J = 1.2$  Hz, 1H), 4.92–4.86 (m, 1H), 4.82 (dd,  $J = 5.8, 3.7$  Hz, 2H), 3.92 (q,  $J = 6.9$  Hz, 2H), 2.13–2.03 (m, 1H), 1.91 (pd,  $J = 6.9, 2.5$  Hz, 1H), 1.67 (dt,  $J = 13.4, 3.9$  Hz, 2H), 1.55–1.40 (m, 2H), 1.26 (t,  $J = 7.0$  Hz, 3H), 1.17–1.02 (m, 2H), 0.92 (d,  $J = 6.5$  Hz, 3H), 0.88 (d,  $J = 7.0$  Hz, 3H), 0.76 (d,  $J = 6.9$  Hz, 3H).  $^{13}\text{C}$  NMR (101 MHz, DMSO- $d_6$ )  $\delta$  164.35, 152.12, 143.28, 136.47, 136.42, 134.03, 119.28, 118.08, 91.88, 75.87, 64.03, 46.90, 34.09, 31.27, 26.15, 23.28, 22.36, 21.10, 16.63, 14.42.

**The characterization of 5a:**

LC/MS:  $m/z$  291.3  $[\text{M}+\text{H}]^+$ .  $^1\text{H}$  NMR (400 MHz, DMSO- $d_6$ )  $\delta$  8.97 (s, 1H), 8.73 (s, 1H), 8.20 (d,  $J = 1.3$  Hz, 1H), 7.68 (d,  $J = 1.3$  Hz, 1H), 5.30 (d,  $J = 2.5$  Hz, 1H), 4.80 (d,  $J = 2.6$  Hz, 1H), 3.65 (s, 3H), 1.47 (s, 9H).  $^{13}\text{C}$  NMR (101 MHz, DMSO)  $\delta$  153.22, 151.98, 142.48, 137.47, 133.66, 126.05, 117.04, 94.01, 80.59, 63.65, 28.41.

**The synthesis of 7a, 7b**

**Synthesis report of ethyl 4-(1-ethoxyvinyl)quinoline-3-carboxylate (7a)**

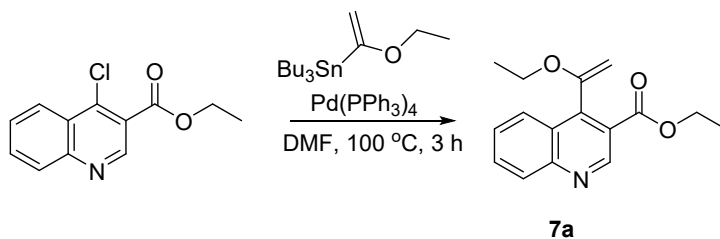

To a suspension of ethyl 4-chloroquinoline-3-carboxylate (500 mg, 2.12 mmol), tributyl(1-ethoxyvinyl) stannane (766.2 mg, 2.12 mmol, 716.11  $\mu$ L) and Tetrakis(triphenylphosphine)palladium(0) (490.10 mg, 424.33  $\mu$ mol) in DMF (10 mL) was stirred at 100  $^{\circ}$ C for 3 hours, then brought to room temperature and poured out into ice water. Ethyl acetate (50 mL) was added. The mixture was filtered over celite. Celite was washed with Ethyl acetate (50 mL). The filtrate was extracted with Ethyl acetate (50 mL). The organic layer was washed with water (30 mL), dried ( $\text{MgSO}_4$ ), filtered and the solvent was evaporated. The residue was purified by flash column chromatography on silica gel (eluting with ethyl acetate/ petroleum ether from 0 to 50%) to give ethyl 4-(1-ethoxyvinyl)quinoline-3-carboxylate (105 mg, 387.01  $\mu$ mol, 18.24% yield) as colorless oil. Chemical Formula:  $\text{C}_{16}\text{H}_{17}\text{NO}_3$ . LC/MS(ESI+) [(M+H) $^{+}$ ]: 271.9.  $^1\text{H}$  NMR (400 MHz,  $\text{DMSO}-d_6$ )  $\delta$  9.13 (s, 1H), 8.19 (dd,  $J = 8.4, 1.2$  Hz, 1H), 8.11 (d,  $J = 8.4$  Hz, 1H), 7.91 (ddd,  $J = 8.4, 6.8, 1.6$  Hz, 1H), 7.74 (ddd,  $J = 8.4, 6.8, 1.2$  Hz, 1H), 4.74 (d,  $J = 2.8$  Hz, 1H), 4.33 (q,  $J = 7.2$  Hz, 2H), 4.28 (d,  $J = 2.8$  Hz, 1H), 4.02 (q,  $J = 7.2$  Hz, 2H), 1.31 (dt,  $J = 12.4, 7.2$  Hz, 6H).  $^{13}\text{C}$  NMR (101 MHz,  $\text{DMSO}$ )  $\delta$  166.32, 155.00, 149.66, 149.15, 143.85, 131.89, 129.69, 128.49, 126.94, 125.25, 123.62, 89.42, 64.14, 61.82, 14.66, 14.34.

### Synthesis report of ethyl 4-(1-ethoxyvinyl)-6-fluoroquinoline-3-carboxylate (7b)

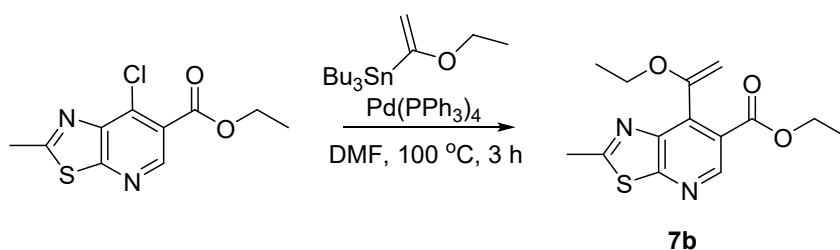

To a suspension of ethyl 7-chloro-2-methyl-thiazolo[5,4-b]pyridine-6-carboxylate (500 mg, 1.95 mmol), tributyl(1-ethoxyvinyl)stannane (703.4 mg, 1.95 mmol, 657.41  $\mu$ L) and Tetrakis(triphenylphosphine)palladium(0) (449.9 mg, 389.55  $\mu$ mol) in DMF (10 mL) was stirred at 100  $^{\circ}$ C for 3 hours, then brought to room temperature and poured out into ice water. Ethyl acetate (50 mL) was added. The mixture was filtered over celite. Celite was washed with Ethyl acetate (50 mL). The filtrate was extracted with Ethyl acetate (50 mL). The organic layer was washed with water (30 mL), dried ( $\text{MgSO}_4$ ), filtered and the solvent was evaporated. The

residue was purified by flash column chromatography on silica gel (eluting with ethyl acetate/petroleum ether from 0 to 50%) to give ethyl 4-(1-ethoxyvinyl) quinoline-3-carboxylate (105 mg, 387.01  $\mu\text{mol}$ , 18.24% yield) as colorless oil. Chemical Formula:  $\text{C}_{14}\text{H}_{16}\text{N}_2\text{O}_3\text{S}$ . LC/MS(ESI+) [(M+H)<sup>+</sup>]: 292.9. <sup>1</sup>H NMR (400 MHz, DMSO-*d*<sub>6</sub>)  $\delta$  8.75 (s, 1H), 4.78 (s, 2H), 4.31 (q, J = 7.2 Hz, 2H), 3.89 (q, J = 7.2 Hz, 2H), 2.87 (s, 3H), 1.33 – 1.23 (m, 6H). <sup>13</sup>C NMR (101 MHz, DMSO)  $\delta$  169.53, 166.15, 161.38, 153.21, 146.15, 142.65, 136.64, 124.32, 91.23, 63.46, 61.36, 20.98, 14.05, 13.88.

### The synthesis of 3f-h.

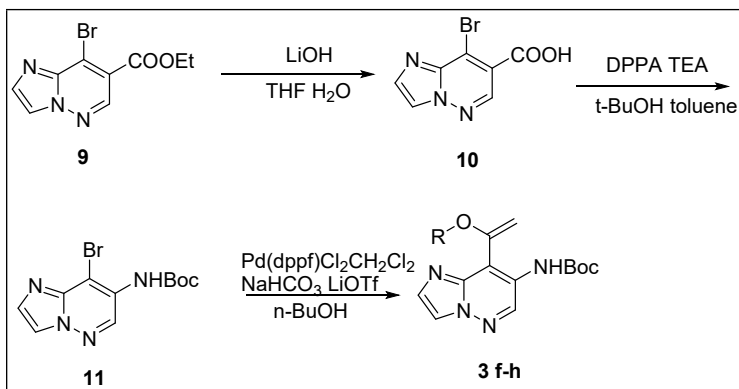

To a stirred solution of ethyl 8-bromoimidazo[1,2-b]pyridazine-7-carboxylate (30.0 g, 111.08 mmol) in THF (300 mL) was added LiOH (5.32 g, 222.15 mmol) in H<sub>2</sub>O (300 mL), the resulting mixture was allowed to stir at 0 °C for 2 hours and monitored by the LCMS until the reaction was completed. MTBE (600 mL, 20 v/w) was charged to the reaction mixture at 10 °C, separated and the aqueous phase was collected. After cooling to 0 °C, the solution was added HCl solution (3 M) at 0 °C until pH=3~4, filtered, the filter cake was dried in vacuo to afford 8-bromoimidazo[1,2-b]pyridazine-7-carboxylic acid (26.6 g, 109.90 mmol, 98.94% yield) as an off white solid, LC/MS(ESI+) [(M+H)<sup>+</sup>]:243, which was directly used to the next step without further purification.

To a solution of 8-bromoimidazo[1,2-b]pyridazine-7-carboxylic acid (24.0 g, 99.16 mmol) in t-BuOH (240 mL) and toluene (240 mL) was added TEA (14.05 g, 138.83 mmol, 19.35 mL) under N<sub>2</sub> atmosphere. The resulting mixture was added DPPA (26.53 g, 109.08 mmol), heated to 100 °C and stirred for 2.5 hours. After cooling to room temperature, and concentrated *in vacuo*, the residue was diluted with EtOAc (48 mL, 2 v/w) and water (96 mL, 4 v/w). After agitating for 30 minutes at room temperature, the mixture was filtered, and the solid was slurried in THF (12 mL, 0.5 v/w), filtered and the solid was dried in vacuum to afford tert-butyl N-(8-bromoimidazo[1,2-b]pyridazin-

7-yl)carbamate (21.5 g, 68.66 mmol, 69.24% yield) as a yellow solid, LC/MS(ESI<sup>+</sup>) [(M+H)<sup>+</sup>]: 313, <sup>1</sup>H NMR (400 MHz, DMSO-*d*<sub>6</sub>) δ 9.34 (s, 1H), 8.56 (s, 1H), 8.34 (d, *J* = 1.0 Hz, 1H), 7.75 (d, *J* = 0.9 Hz, 1H), 1.49 (s, 9H).

### The synthesis of 3f

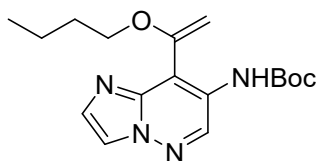

**3f**

To a stirred solution of tert-butyl N-(8-bromoimidazo[1,2-b]pyridazin-7-yl)carbamate (400 mg, 1.28 mmol) in *n*-BuOH (4 mL) were added NaHCO<sub>3</sub> (321.9 mg, 3.83 mmol), 1,1'-Bis(diphenylphosphino)ferrocene-palladium(II)dichloride dichloromethane complex (208.6 mg, 255.47 μmol), lithium trifluoromethanesulfonate (199.3 mg, 1.28 mmol), and 1-vinyloxybutane (511.8 mg, 5.11 mmol), the reaction mixture was degassed and refilled with N<sub>2</sub> three times, heated at 90°C and stirred for 20 hours, then cooled to room temperature, diluted with EA and washed with brine, and dried over Na<sub>2</sub>SO<sub>4</sub>. After filtration and evaporation of the solvent, the crude mixture was purified by silica gel column chromatography using EA/PE=1:10 as eluent to give tert-butyl N-[8-(1-butoxyvinyl)imidazo[1,2-b]pyridazin-7-yl]carbamate (115 mg, 345.97 μmol, 27.09% yield) as a yellow solid, LCMS(ESI<sup>+</sup>) [(M+H)<sup>+</sup>]: 333, <sup>1</sup>H NMR (400 MHz, DMSO-*d*<sub>6</sub>) δ 8.88 (s, 1H), 8.78 (s, 1H), 8.18 (d, *J* = 1.1 Hz, 1H), 7.66 (d, *J* = 0.9 Hz, 1H), 5.32 (d, *J* = 2.1 Hz, 1H), 4.92 (d, *J* = 2.4 Hz, 1H), 3.89 (t, *J* = 6.3 Hz, 2H), 1.75 – 1.65 (m, 3H), 1.47 (s, 9H), 1.44 (s, 2H), 0.94 (t, *J* = 7.4 Hz, 3H). <sup>13</sup>C NMR (101 MHz, DMSO-*d*<sub>6</sub>) δ 153.04, 152.02, 137.43, 133.64, 126.08, 117.02, 94.32, 80.69, 67.77, 30.99, 28.36, 19.43, 14.27.

### The synthesis of 3g

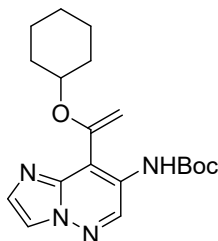

**3g**

To a stirred solution of tert-butyl N-(8-bromoimidazo[1,2-b]pyridazin-7-yl)carbamate (400 mg, 1.28 mmol) in *n*-BuOH (4 mL) were added NaHCO<sub>3</sub> (321.9 mg, 3.83 mmol), 1,1'-Bis(diphenylphosphino)ferrocene-palladium(II)dichloride dichloromethane complex (208.6 mg, 255.47 μmol), lithium trifluoromethanesulfonate (199.3 mg, 1.28 mmol), and vinyloxycyclohexane

(644.8 mg, 5.11 mmol), the reaction mixture was degassed and refilled with N<sub>2</sub> three times, heated at 90°C and stirred for 20 hours, then cooled to room temperature, diluted with EA and washed with brine, and dried over Na<sub>2</sub>SO<sub>4</sub>. After filtration and evaporation of the solvent, the crude mixture was purified by silica gel column chromatography using EA/PE=1:10 as eluent to give tert-butyl N-[8-[1-(cyclohexoxy)vinyl]imidazo[1,2-b]pyridazin-7-yl]carbamate (110 mg, 306.89 umol, 24.03% yield) as a yellow solid, LC/MS(ESI<sup>+</sup>) [(M+H)<sup>+</sup>]: 359, <sup>1</sup>HNMR(400MHz, DMSO-*d*<sub>6</sub>) δ 8.83 (s, 2H), 8.19 (d, *J* = 1.1Hz, 1H), 7.66 (d, *J* = 0.9Hz, 1H), 5.38 (s, 1H), 4.99 (d, *J* = 2.4Hz, 1H), 4.34 – 4.24 (m, 1H), 1.98 – 1.89 (m, 2H), 1.74 – 1.63 (m, 2H), 1.53 (dd, *J* = 10.7, 6.7Hz, 2H), 1.47 (s, 9H), 1.44 – 1.36 (m, 2H), 1.31 – 1.20 (m, 2H). <sup>13</sup>C NMR (101 MHz, DMSO-*d*<sub>6</sub>) δ 152.95, 149.80, 137.51, 133.68, 126.05, 117.07, 96.11, 80.80, 74.96, 31.01, 28.36, 25.63, 23.29.

### The synthesis of 3h

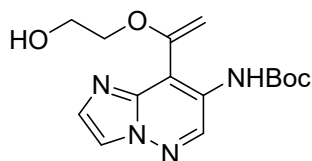

**3h**

To a stirred solution of tert-butyl N-(8-bromoimidazo[1,2-b]pyridazin-7-yl)carbamate (1.0 g, 3.19 mmol) in n-BuOH (10 mL) were added sodium hydrogen carbonate (804.8 mg, 9.58 mmol), 1,1'-Bis(diphenylphosphino)ferrocene-palladium(II)dichloride dichloromethane complex (260.78 mg, 319.34 umol), lithium trifluoromethanesulfonate (498.2 mg, 3.19 mmol), and 2-vinyloxyethanol (1.13 g, 12.77 mmol), the reaction mixture was degassed and refilled with N<sub>2</sub> three times, heated at 90°C and stirred for 20 hours, then cooled to room temperature, diluted with EA and washed with brine, and dried over Na<sub>2</sub>SO<sub>4</sub>. After filtration and evaporation of the solvent, the crude mixture was purified by silica gel column chromatography using MeOH/DCM=1:10 as eluent to give tert-butyl N-[8-[1-(2-hydroxyethoxy)vinyl]imidazo[1,2-b]pyridazin-7-yl]carbamate (140 mg, 437.03 umol, 13.69% yield) as a yellow solid, LC/MS(ESI<sup>+</sup>) [(M+H)<sup>+</sup>]: 321, <sup>1</sup>HNMR(400MHz, DMSO-*d*<sub>6</sub>) δ 8.98 (s, 1H), 8.83 (s, 1H), 8.20 (d, *J* = 1.0Hz, 1H), 7.66 (s, 1H), 5.19 (d, *J* = 2.4Hz, 2H), 4.93 (d, *J* = 2.6Hz, 1H), 3.99 (t, *J* = 4.7Hz, 2H), 3.73 (s, 2H), 1.46 (s, 9H). <sup>13</sup>C NMR (101 MHz, DMSO-*d*<sub>6</sub>) δ 153.33, 151.61, 142.06, 137.53, 133.57, 126.47, 116.98, 94.06, 80.72, 69.92, 59.21, 28.36.

## General Procedure for the Asymmetric Hydrogenation: 4a-h, 6a, 8c-d

### The synthesis of 4a

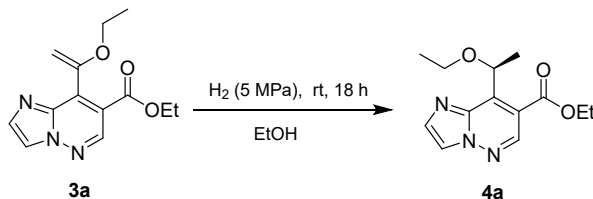

Typical procedure: Charged compound **3a** (8.9 g, 34.1 mmol) into a 300 mL three-necked flask at r.t. under N<sub>2</sub>, then EtOH (90 mL, 30 v/w), (S)-Ru(OAc)<sub>2</sub>(BINAP) (0.43 g, 0.51 mmol, 0.015 eq) and (S)-RuCl<sub>2</sub>(BINAP) (0.51 mmol, 0.015 eq) into the flask at r.t.. The resulting mixture was agitated for 48 h under H<sub>2</sub> (5 Mpa). After that the mixture was filtered and collected the filtrate. After concentration of the filtrate, the residue was purified by column of chromatography using PE/EtOAc= 1:0~5:1 as eluent. Compound **4a** was obtained as a gray solid. (yield 90%, purity 99.0%), LC/MS(ESI) m/z: 264.1 [M+1],

<sup>1</sup>H NMR(400 MHz, CDCl<sub>3</sub>-d<sub>1</sub>) δ 8.85(s, 1H), 8.66(s, 1H), 8.15(d, *J*=4 Hz, 1H), 4.68 (q, *J*= 6.8 Hz, 1H), 4.29(q, 2H), 3.88 (q, *J* = 8.0Hz, 2H), 1.53(d, 3H), 1.49(d, *J*=6.8 Hz, 3H), 1.30(t, *J*=7.8 Hz, 3H). <sup>13</sup>C NMR (100 MHz, DMSO-*d*<sub>6</sub>) δ 166.05, 142.46, 140.05, 135.85, 134.76, 118.46, 117.99, 71.74, 64.76, 61.63, 20.75, 14.79, 13.81.

#### The character of **4b**:

LC/MS: m/z 292 [M+H]<sup>+</sup>. <sup>1</sup>H NMR (400 MHz, DMSO-*d*<sub>6</sub>) δ 8.54 (s, 1H), 8.39 (d, *J* = 1.2 Hz, 1H), 7.87 (d, *J* = 1.2 Hz, 1H), 5.32 (q, *J* = 6.6 Hz, 1H), 3.41 – 3.36 (m, 1H), 3.33 – 3.26 (m, 1H), 1.63 (d, *J* = 6.7 Hz, 3H), 1.57 (s, 9H), 1.07 (t, *J* = 7.0 Hz, 3H). <sup>13</sup>C NMR (100 MHz, DMSO-*d*<sub>6</sub>) δ 165.12, 142.71, 139.24, 135.96, 134.69, 119.81, 117.88, 82.69, 71.80, 64.94, 27.66, 20.62, 14.87.

#### The characterization of **4c/4d**:

LC/MS: m/z 374.2 [M+H]<sup>+</sup>. <sup>1</sup>H NMR (400 MHz, DMSO-*d*<sub>6</sub>) δ 8.52 (s, 1H), 8.42 (q, *J* = 1.9 Hz, 1H), 7.90 (d, *J* = 1.2 Hz, 1H), 5.36 (p, *J* = 6.6 Hz, 1H), 4.87 (tt, *J* = 10.9, 4.1 Hz, 1H), 3.39 (ddd, *J* = 14.9, 7.4, 2.2 Hz, 1H), 3.28 (dddd, *J* = 13.7, 6.9, 5.2, 1.9 Hz, 1H), 2.17 (dtd, *J* = 11.8, 7.9, 3.0 Hz, 1H), 1.90 – 1.74 (m, 1H), 1.72 – 1.67 (m, 1H), 1.64(dd, *J* = 6.7, 4.6 Hz, 4H), 1.52 – 1.39 (m, 2H), 1.08 – 1.03 (m, 3H), 0.93 (s, 1H), 0.92 – 0.90 (m, 3H), 0.89 – 0.84 (m, 3H), 0.79 (d, *J* = 6.9 Hz, 3H). <sup>13</sup>C NMR (100 MHz, DMSO-*d*<sub>6</sub>) δ 165.58, 142.52, 140.04, 135.83, 134.90, 118.66, 118.02, 75.60, 71.67, 64.86, 46.54, 40.31, 33.63, 30.83, 25.95, 23.07, 21.93, 20.68, 16.37, 14.91.



The characterization data of **4e** :

LC/MS:  $m/z$  307.1  $[M+H]^+$ .  $^1H$  NMR (400 MHz, DMSO- $d_6$ )  $\delta$  8.92 (s, 1H), 8.83 (s, 1H), 8.18 (d,  $J = 1.3$  Hz, 1H), 7.65 (d,  $J = 1.3$  Hz, 1H), 5.30 (q,  $J = 6.7$  Hz, 1H), 3.52 – 3.44 (m, 1H), 3.41 – 3.36 (m, 1H), 1.53 (d,  $J = 6.6$  Hz, 3H), 1.49 (s, 9H), 1.15 (t,  $J = 7.0$  Hz, 3H);  $^{13}C$  NMR (101 MHz, DMSO- $d_6$ )  $\delta$  153.01, 140.65, 138.00, 133.56, 126.40, 116.71, 81.10, 72.40, 64.90, 28.37, 20.15, 15.44.

The characterization data of **4f**

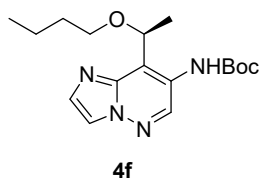

gray solid, yield 96%, 93.4% ee, LCMS(ESI)  $m/z$ : 335.2  $[M+1]$

$^1H$  NMR (300 MHz,  $CDCl_3-d_1$ )  $\delta$  9.38 (s, 1H), 8.78 (s, 1H), 7.84 (d,  $J = 1.2$  Hz, 1H), 7.60 (d,  $J = 1.2$  Hz, 1H), 5.48 (q,  $J = 6$  Hz, 1H), 3.41~3.62 (m, 2H), 1.58 (d,  $J = 6$  Hz, 3H), 1.54 (s, 9H), 1.38~1.66 (m, 4H), 0.93 (t,  $J = 6$  Hz, 3H).  $^{13}C$  NMR (101 MHz,  $CDCl_3-d_1$ )  $\delta$  152.4, 138.4 (d,  $J = 90$  Hz), 132.7, 127.5, 121.3, 115.9, 81.3, 73.3, 69.8, 31.7, 29.6 (d,  $J = 12$  Hz), 28.2, 19.4 (d,  $J = 81$  Hz), 13.8.

The characterization data of **4g**

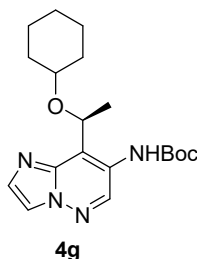

gray solid, yield 90.5%, 95.5% ee, LC/MS(ESI)  $m/z$ : 361.3  $[M+1]$

$^1H$  NMR (300 MHz,  $CDCl_3-d_1$ )  $\delta$  9.40 (s, 1H), 9.05 (s, 1H), 7.84 (d,  $J = 1.2$  Hz, 1H), 7.62 (d,  $J = 1.2$  Hz, 1H), 5.68 (q,  $J = 6$  Hz, 1H), 3.41~3.48 (m, 1H), 1.56 (d,  $J = 6$  Hz, 3H), 1.53 (s, 9H), 1.33~1.75 (m, 10H).  $^{13}C$  NMR (101 MHz,  $CDCl_3-d_1$ )  $\delta$  152.4, 138.4 (d,  $J = 258$  Hz), 134.1, 128.1, 120.3, 115.9, 81.4, 77.2, 70.1, 32.3, 31.6, 29.6, 28.2, 25.2, 23.5 (d,  $J = 33$  Hz), 20.5.

The characterization data of **4h**

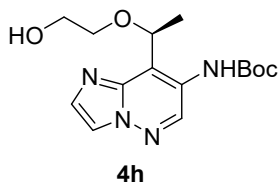

gray solid, yield 96%, 90.6% ee, LCMS(ESI) m/z: 323.2 [M+1]

$^1\text{H}$  NMR (300 MHz,  $\text{CDCl}_3-d_1$ )  $\delta$  9.29 (s, 1H), 8.55 (s, 1H), 7.85 (d,  $J=1.2$  Hz, 1H), 7.60 (d,  $J=1.2$  Hz, 1H), 5.56 (q,  $J=6$  Hz, 1H), 3.54~3.90 (m, 4H), 1.62 (d,  $J=6$  Hz, 3H), 1.54 (s, 9H).  $^{13}\text{C}$  NMR (101 MHz,  $\text{CDCl}_3-d_1$ )  $\delta$  152.4, 138.6 (d,  $J=213$  Hz), 132.6, 127.4, 121.4, 116.0, 81.6, 73.4, 71.0, 61.6, 28.2, 19.6.

### The synthesis of 6a.

Charge compound **5a** (89.7 g, 3.45 mmol) into a 2 L three-necked flask at r.t. under  $\text{N}_2$ , then dichloromethane (897 mL, 10 v/w), (S)-RuCl[(p-cymene)(binap)Cl] (2.87g, 32.5 mmol, 0.01 eq) into the flask at r.t.. The mixture was agitated for 48 h under  $\text{H}_2$  (5 Mpa). After remaining starting material  $\leq 0.5\%$ , the mixture was filtered and collected the filtrate. After concentration of the filtrate, the residue was purified by column of chromatography using PE/EtOAc = 1:0~5:1 as eluent. Compound **6a** was obtained as a gray solid. (82.5g, yield: 93%, purity 99%, 97 % ee, LCMS(ESI) m/z: 293.2 [M+1])  $^1\text{H}$  NMR (400 MHz,  $\text{CDCl}_3-d_1$ )  $\delta$  8.85 (s, 1H), 8.66 (s, 1H), 8.15 (d,  $J=4$  Hz, 1H), 7.64 (d,  $J=4$  Hz, 1H), 5.17 (q,  $J=8$  Hz, 1H), 3.23 (s, 3H), 1.53 (d, 3H), 1.47 (s, 9H).  $^{13}\text{C}$  NMR (101 MHz,  $\text{DMSO}-d_6$ )  $\delta$  153.01, 140.65, 138.00, 133.56, 126.40, 116.71, 81.10, 72.40, 64.90, 28.37, 20.15.

### The characterization data of 8c

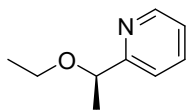

**8c**

gray solid, yield 87%, 61.6% ee, LCMS(ESI) m/z: 152.2 [M+1]

$^1\text{H}$  NMR (300 MHz,  $\text{CDCl}_3-d_1$ )  $\delta$  8.85 (dq,  $J_1=6$  Hz,  $J_2=1.2$  Hz, 1H), 7.65 (dt,  $J_1=6$  Hz,  $J_2=9$  Hz, 1H), 7.40 (dt,  $J_1=9$  Hz,  $J_2=1.2$  Hz, 1H), 7.10~7.16 (m, 1H), 4.50 (q,  $J=6$  Hz, 1H), 3.53 (q,  $J=6$  Hz, 2H), 1.59 (d,  $J=6$  Hz, 3H), 1.26 (t,  $J=6$  Hz, 3H).  $^{13}\text{C}$  NMR (101 MHz,  $\text{CDCl}_3$ -

$d_1$ )  $\delta$  163.8, 148.9(d,  $J=60$  Hz), 136.4 (d,  $J=180$  Hz), 122.3 (d,  $J=90$  Hz), 119.7, 78.9, 64.4, 22.6, 15.3 (d,  $J=24$  Hz).

The data of **8d**

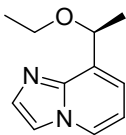

**8d**

gray solid, yield 97%, 63.6% *ee*, LCMS(ESI)  $m/z$ : 191.1 [M+1]

$^1\text{H}$  NMR (300 MHz,  $\text{CDCl}_3$ - $d_1$ )  $\delta$  8.06 (dd,  $J_1=9$  Hz,  $J_2=3$  Hz, 1H), 7.62 (dd,  $J_1=9$  Hz,  $J_2=3$  Hz, 1H), 7.28 (dt,  $J_1=6$  Hz,  $J_2=1.2$  Hz, 1H), 6.83 (t,  $J=6$  Hz, 1H), 5.24 (q,  $J=6$  Hz, 1H), 3.27~3.55 (m, 2H), 1.43 (d,  $J=6$  Hz, 3H), 1.18 (t,  $J=6$  Hz, 3H).  $^{13}\text{C}$  NMR (101 MHz,  $\text{CDCl}_3$ - $d_1$ )  $\delta$  144.1, 133.8, 132.9, 124.2, 119.2, 112.5 (d,  $J=42$  Hz), 72.5, 64.5, 22.5, 15.5.

# NMR and chiral HPLC Spectra

## Ethyl 8-(1-ethoxyvinyl)imidazo[1,2-b]pyridazine-7-carboxylate(3a)

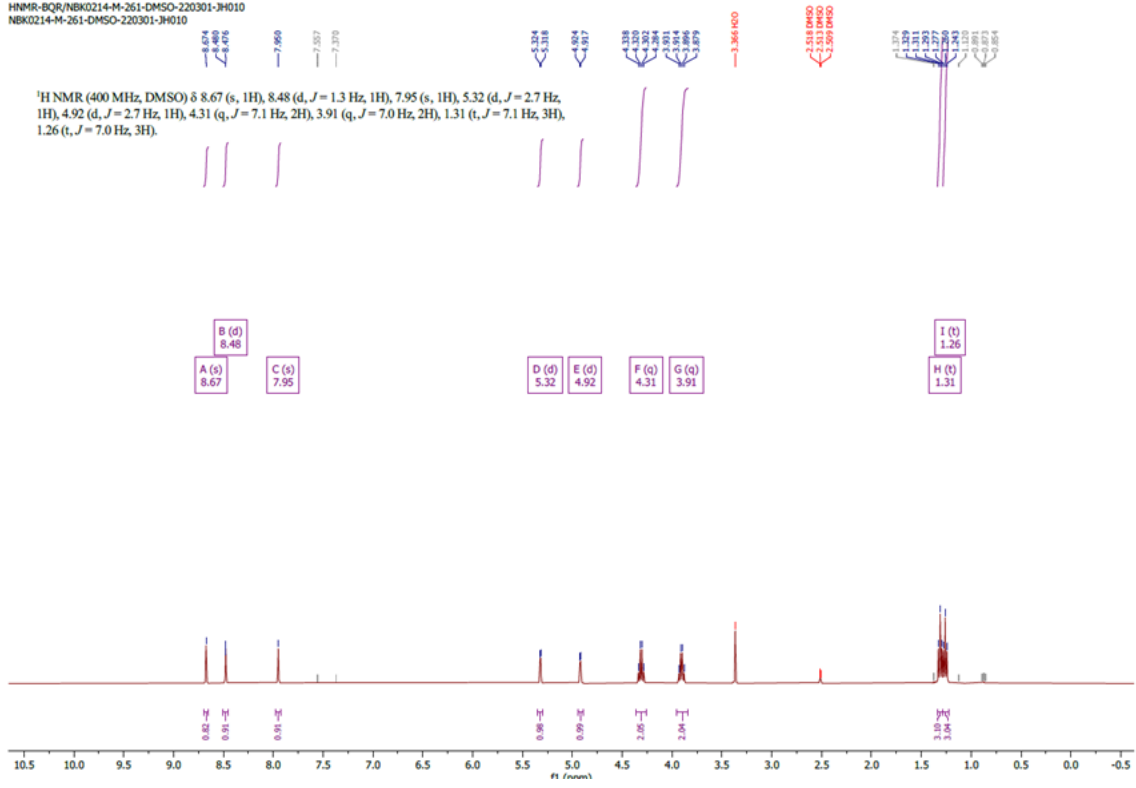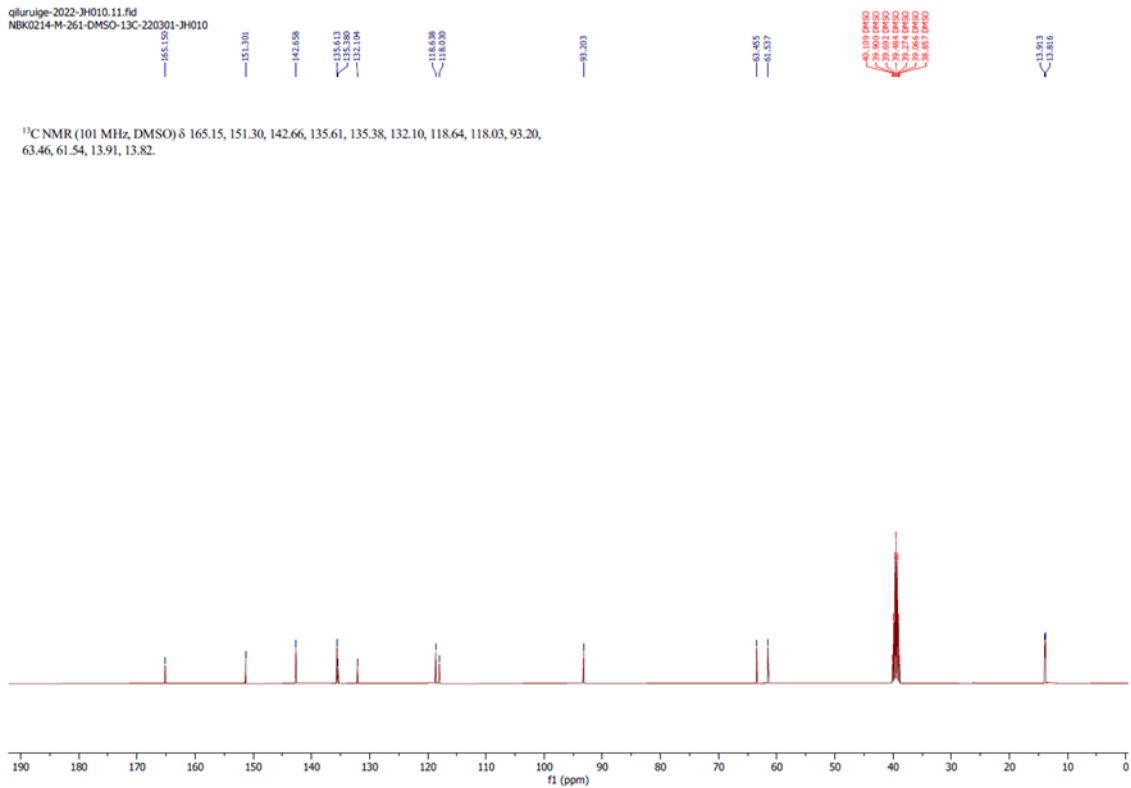

# Tert-butyl 8-(1-ethoxyvinyl)imidazo[1,2-b]pyridazine-7-carboxylate(3b)

qiluruige-2022-JH040.135.fid  
NBK0214-M-289-DMSO-220309-JH040

<sup>1</sup>H NMR (400 MHz, DMSO) δ 8.67 (s, 1H), 8.45 (d, *J* = 1.1 Hz, 1H), 7.93 (d, *J* = 1.2 Hz, 1H), 4.92 (d, *J* = 2.8 Hz, 1H), 4.82 (d, *J* = 2.8 Hz, 1H), 3.93 (q, *J* = 7.0 Hz, 2H), 1.53 (s, 9H), 1.27 (t, *J* = 7.0 Hz, 3H).

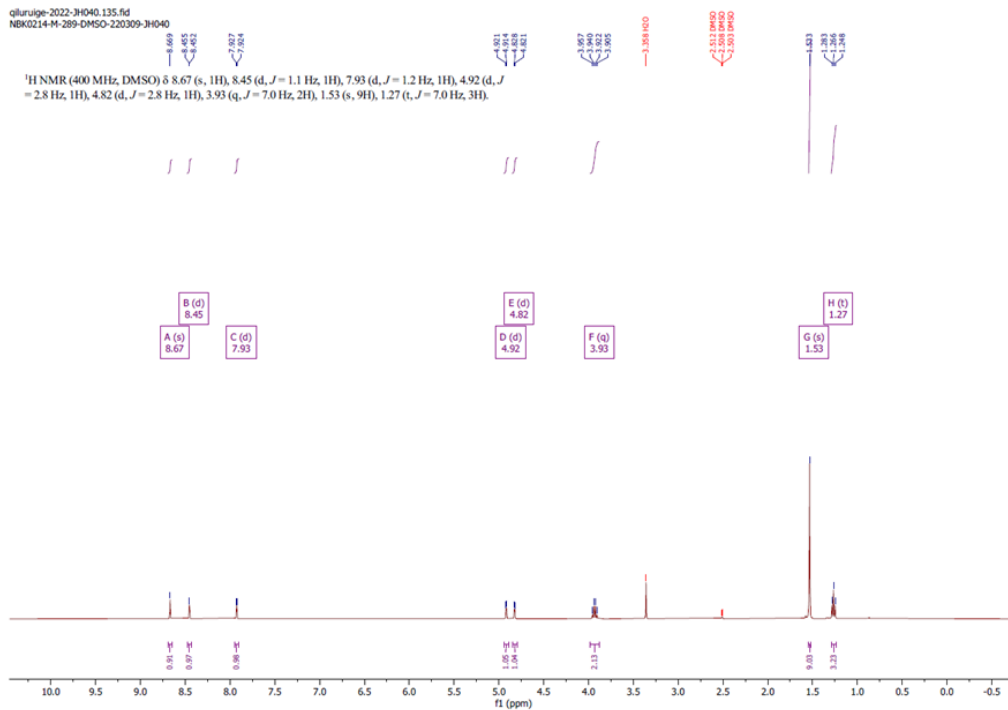

qiluruige-2022-JH040.136.fid  
NBK0214-M-289-DMSO-220309-13C-JH040

<sup>13</sup>C NMR (101 MHz, DMSO) δ 164.13, 152.11, 143.54, 136.33, 136.21, 133.47, 119.41, 119.09, 91.98, 82.82, 63.91, 28.04, 14.44.

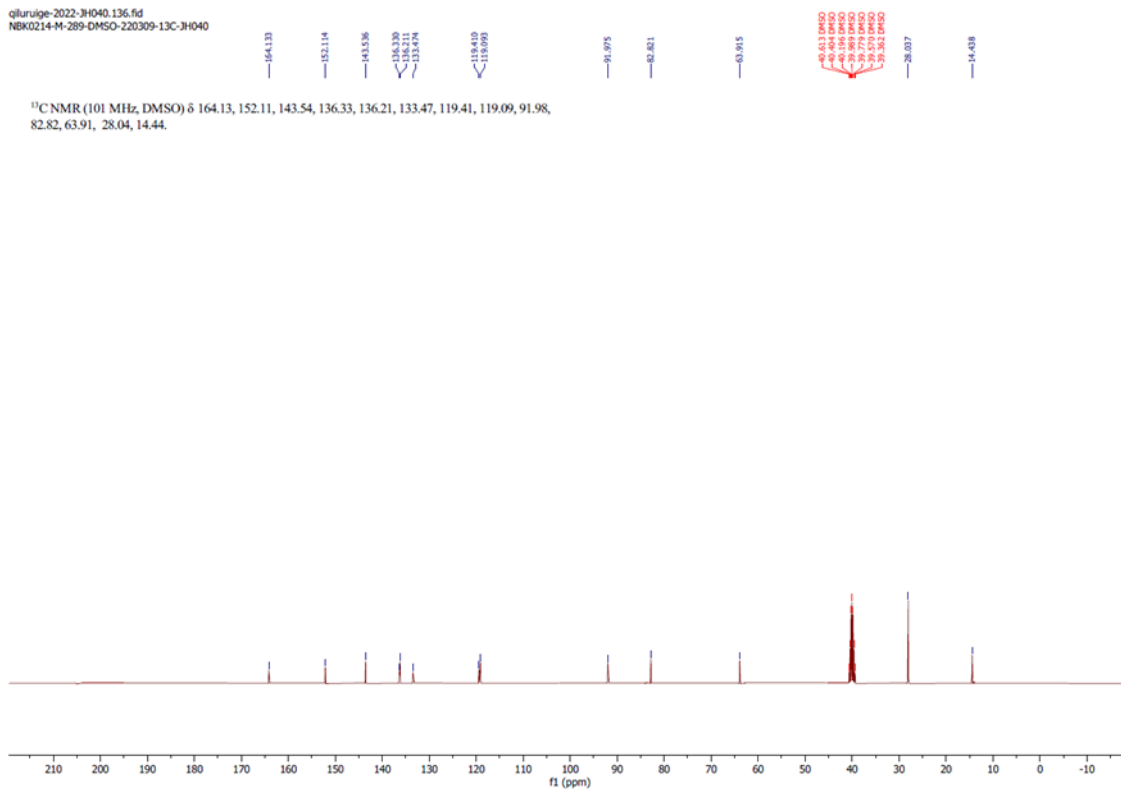

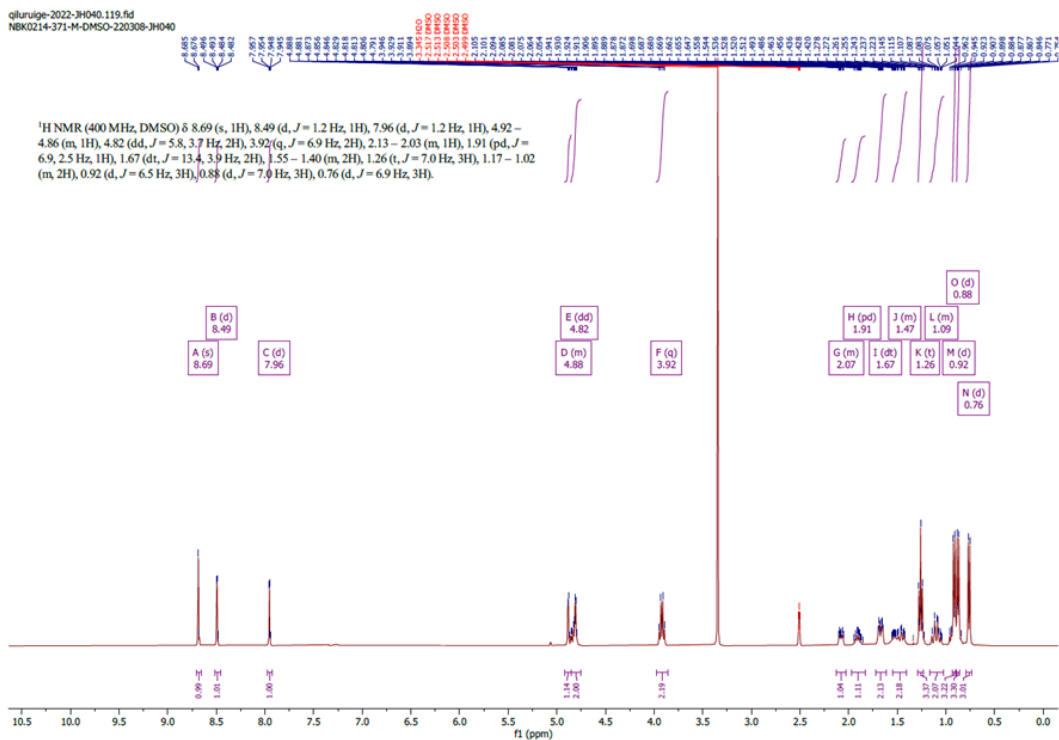

**2-isopropyl-5-methylcyclohexyl 8-(1-ethoxyvinyl)imidazo[1,2-b]pyridazine-7-carboxylate(3c)**

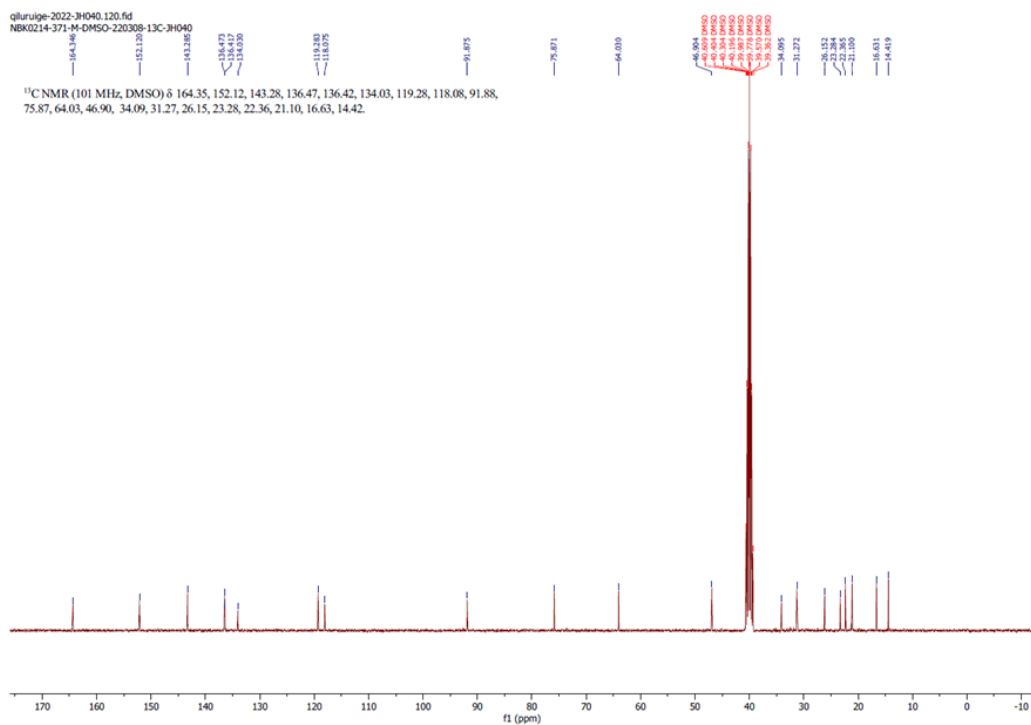

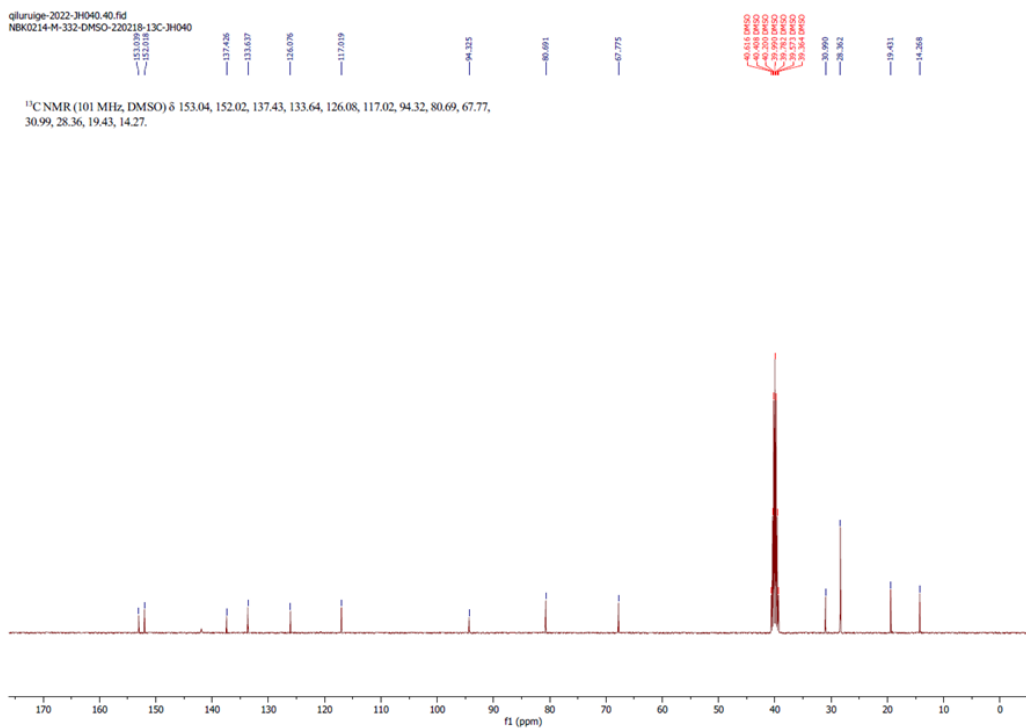

### Tert-butyl (8-(1-butoxyvinyl)imidazo[1,2-b]pyridazin-7-yl)carbamate(3f)

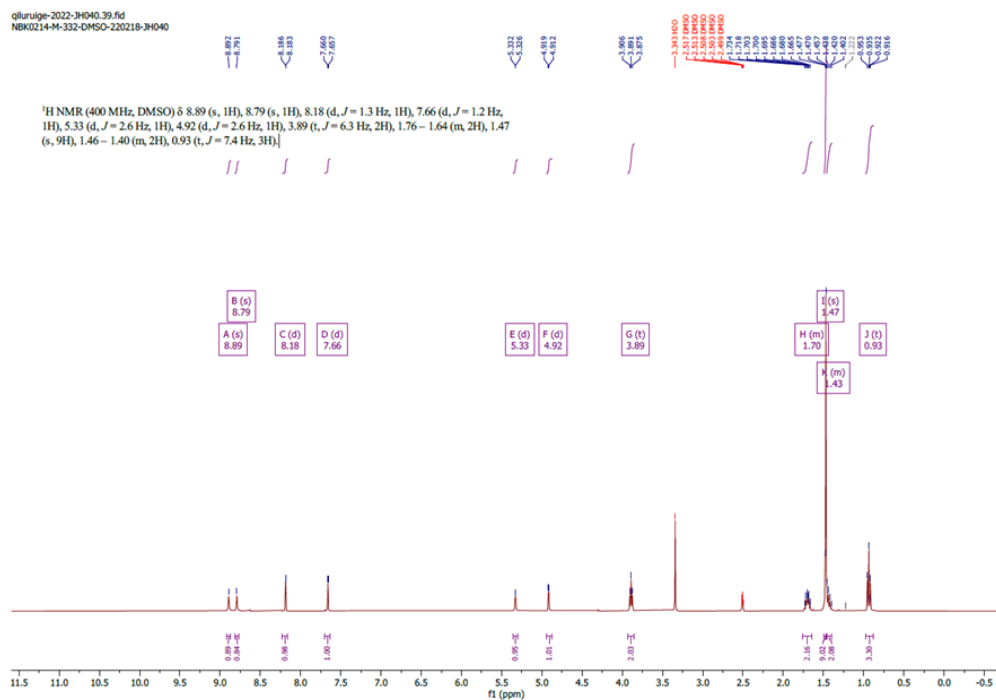









# Synthesis report of ethyl 4-(1-ethoxyvinyl)quinoline-3-carboxylate (7a)

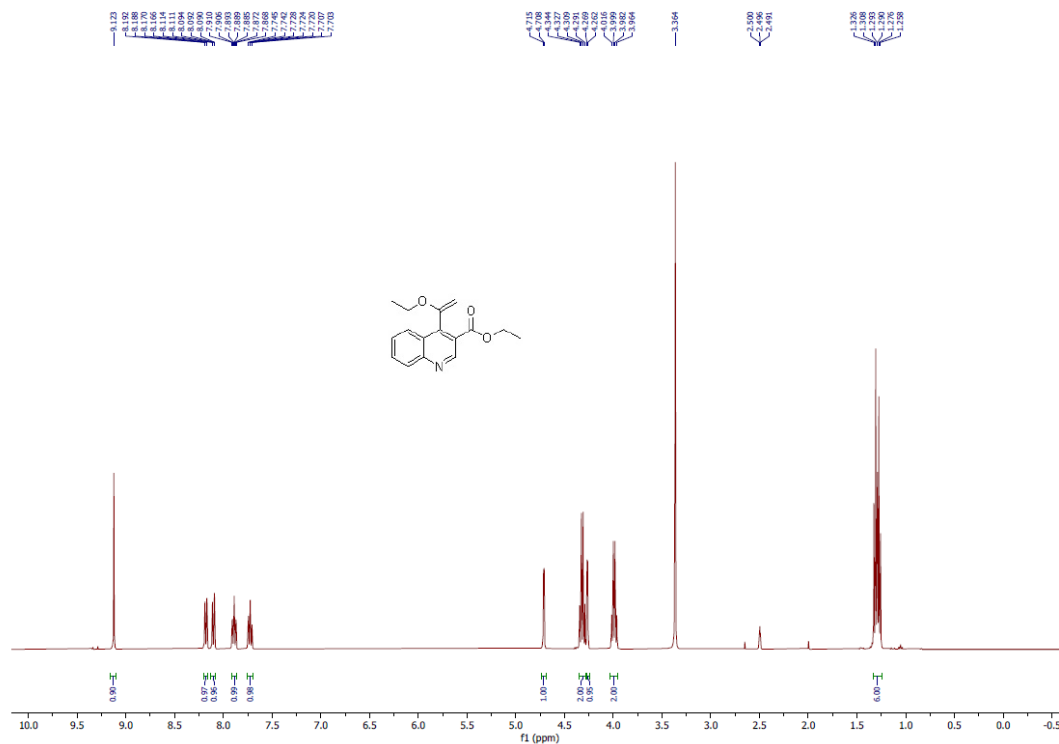

# Synthesis report of ethyl 4-(1-ethoxyvinyl)-6-fluoroquinoline-3-carboxylate (7b)

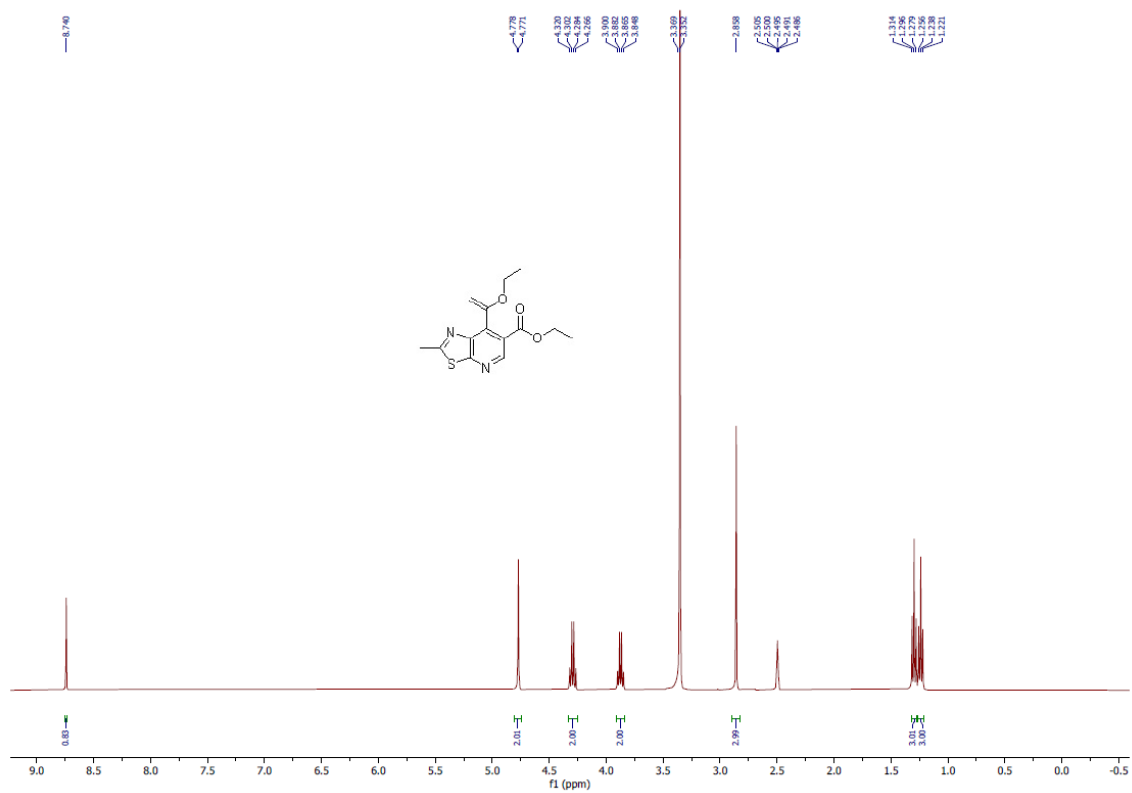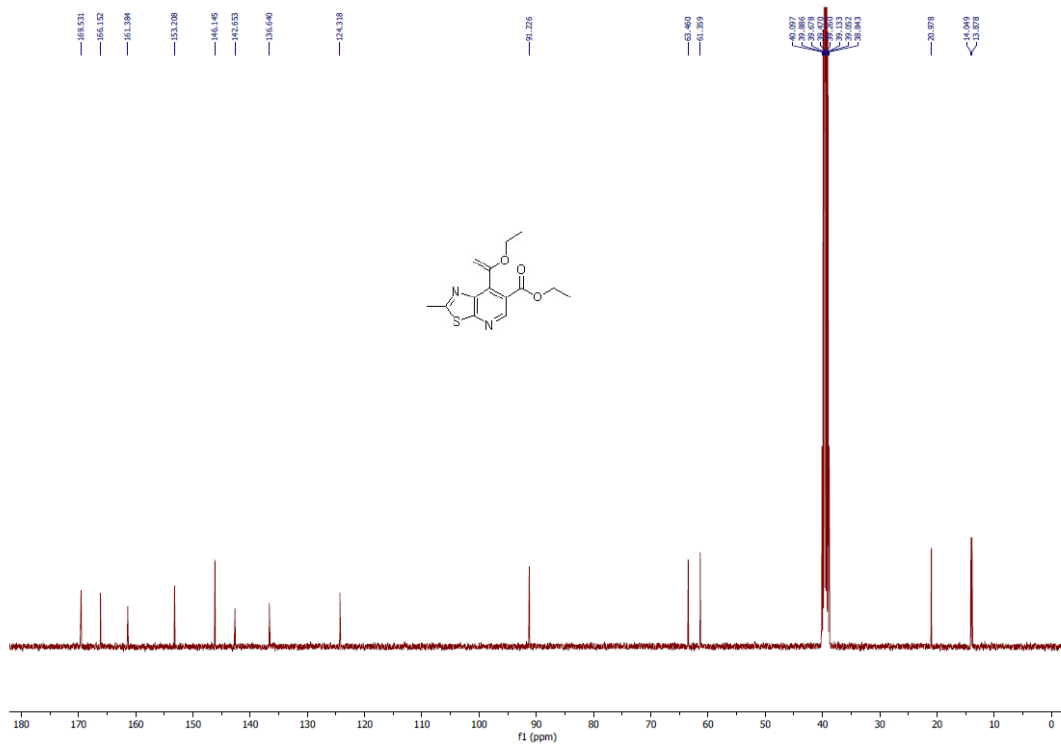



qiluruige-2022-JH040.41.fid  
NBK0214-M-334-DMSO-220218-JH040

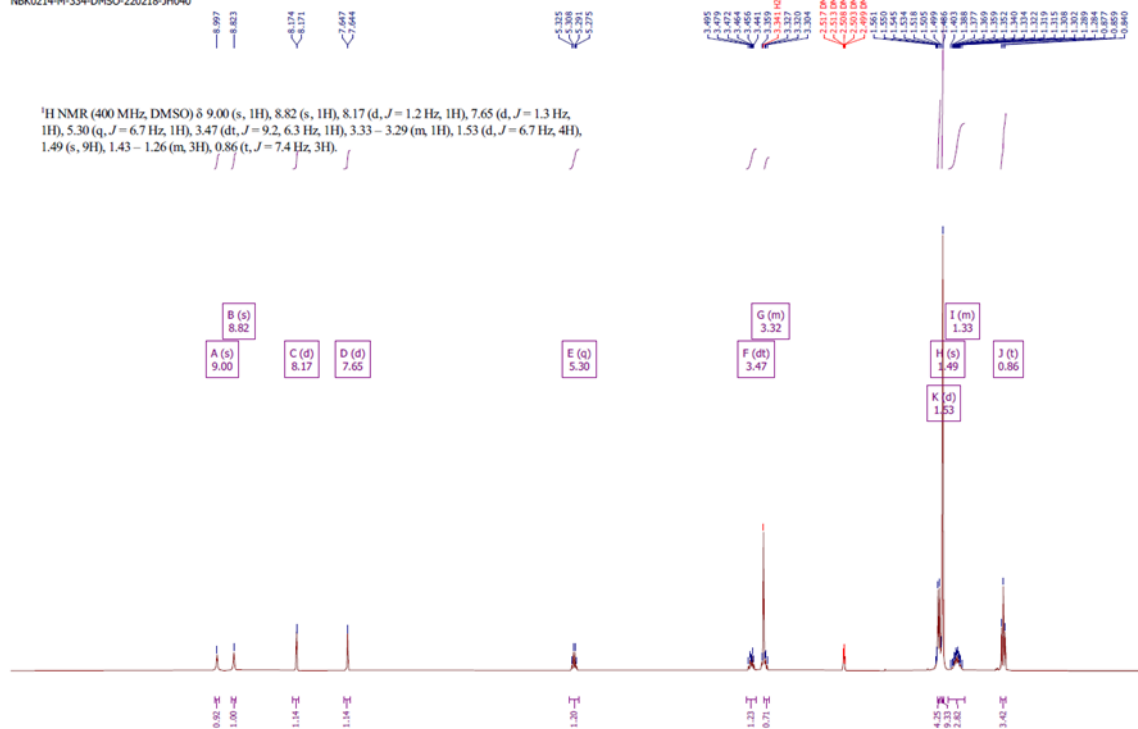

qiluruige-2022-JH040.42.fid  
NBK0214-M-334-DMSO-220218-13C-JH040

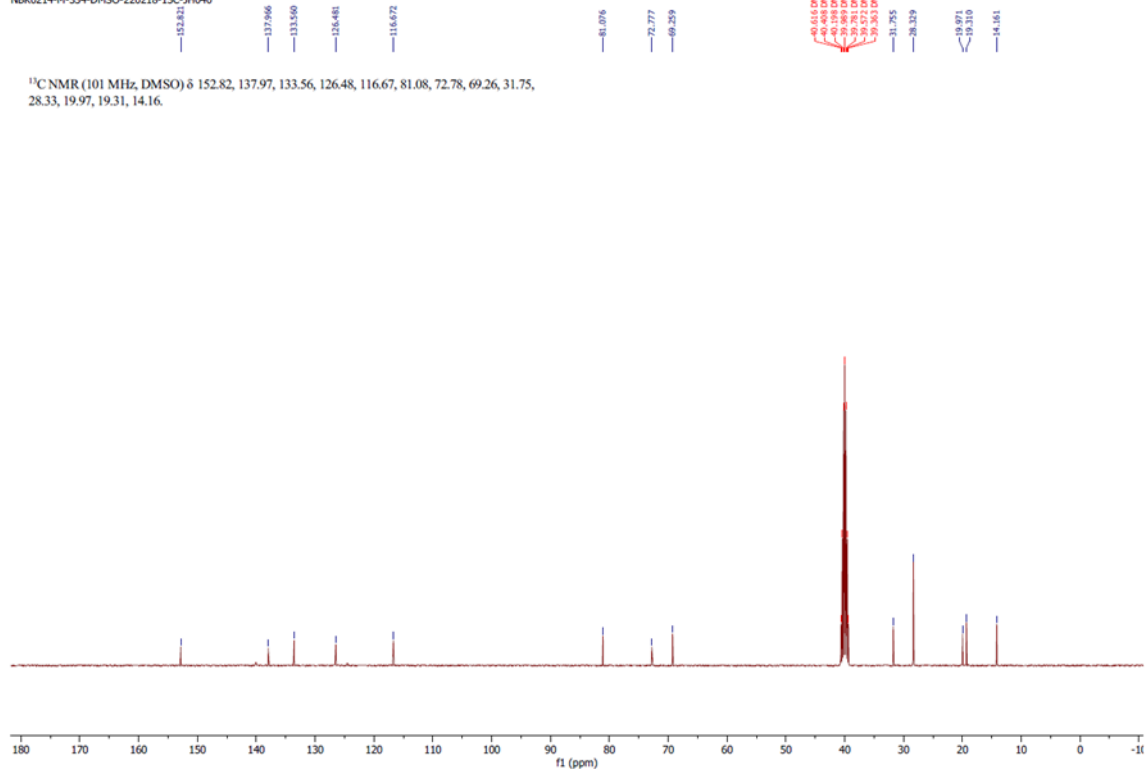

**Tert-butyl (R)-(8-(1-butoxyethyl)imidazo[1,2-b]pyridazin-7-yl)carbamate(4f)**







**yl)carbamate(4g)**

# Tert-butyl (R)-(8-(1-(2-hydroxyethoxy)ethyl)imidazo[1,2-b]pyridazin-7-

qllruige-2022-3H040.74.fid  
NBK0214-M-320-DMSO-220224-3H040

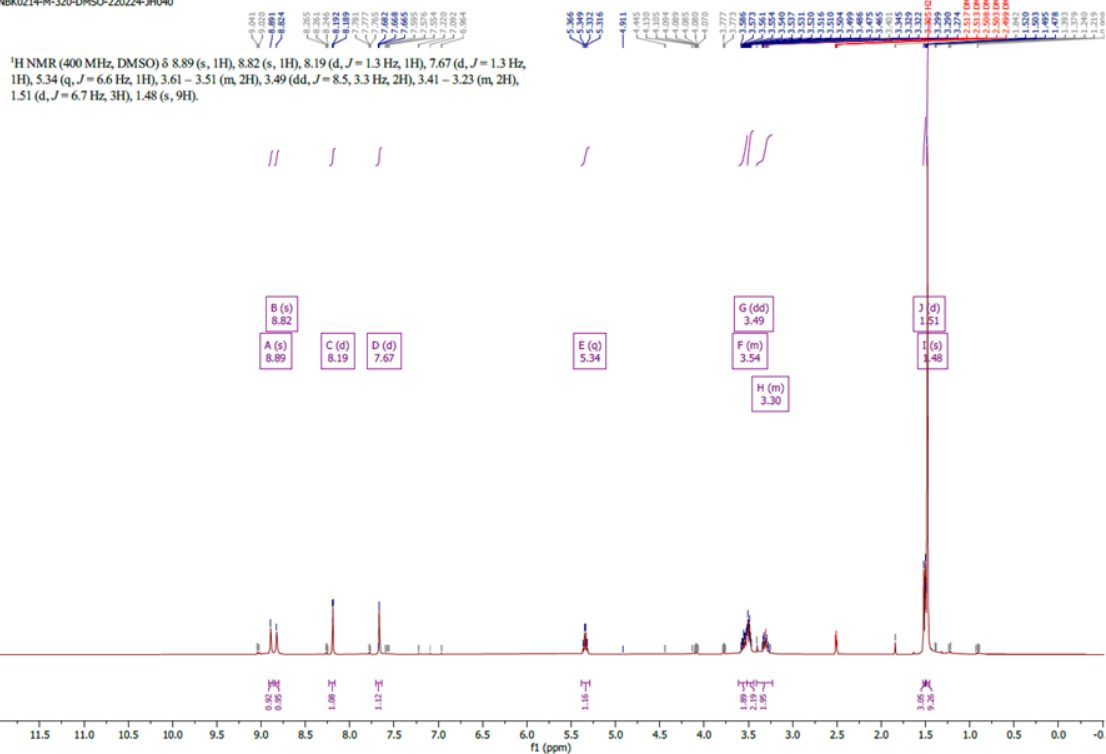

qllruige-2022-3H040.75.fid  
NBK0214-M-320-DMSO-220224-13C-3H040

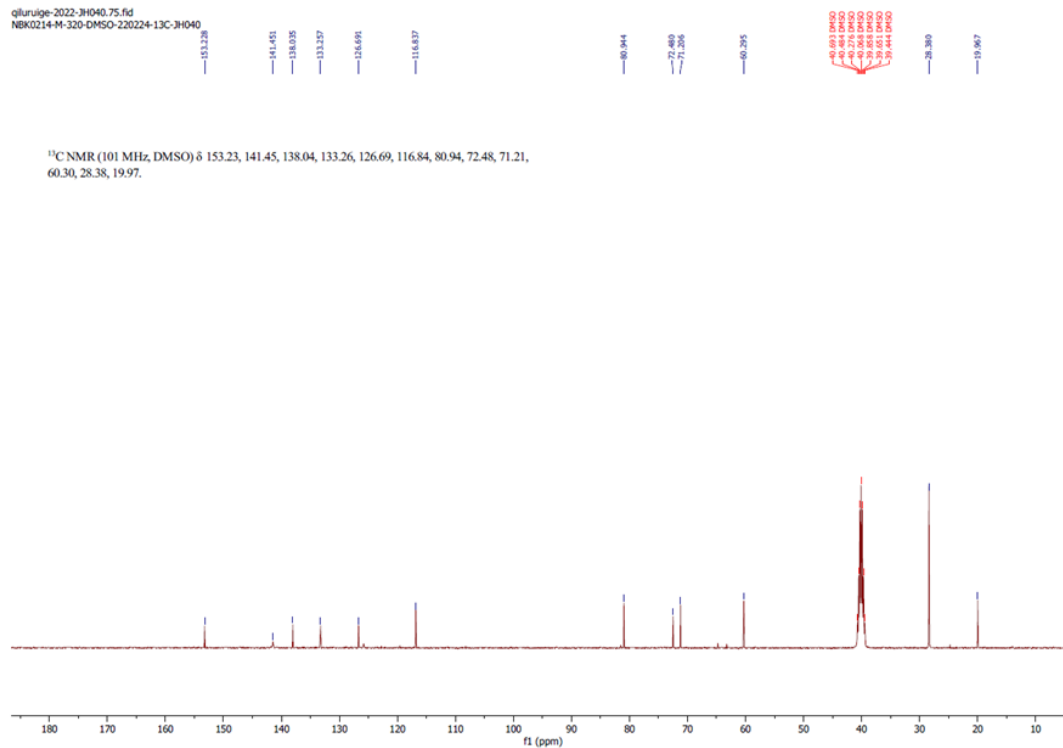

yl)carbamate(4h)

The chiral HPLC spectra

The chiral HPLC spectra of 4a-4e

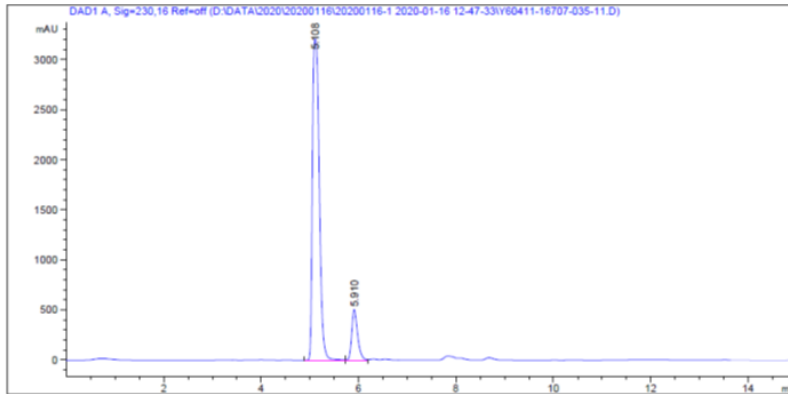

```
=====  
Area Percent Report  
=====
```

Sorted By : Signal  
Multiplier : 1.0000  
Dilution : 1.0000  
Use Multiplier & Dilution Factor with ISTDs

Signal 1: DAD1 A, Sig=230,16 Ref=off

| Peak # | RetTime [min] | Type | Width [min] | Area [mAU*s] | Height [mAU] | Area %  |
|--------|---------------|------|-------------|--------------|--------------|---------|
| 1      | 5.108         | BV   | 0.1562      | 3.14183e4    | 3208.81592   | 88.0365 |
| 2      | 5.910         | VV   | 0.1282      | 4269.49805   | 507.06070    | 11.9635 |

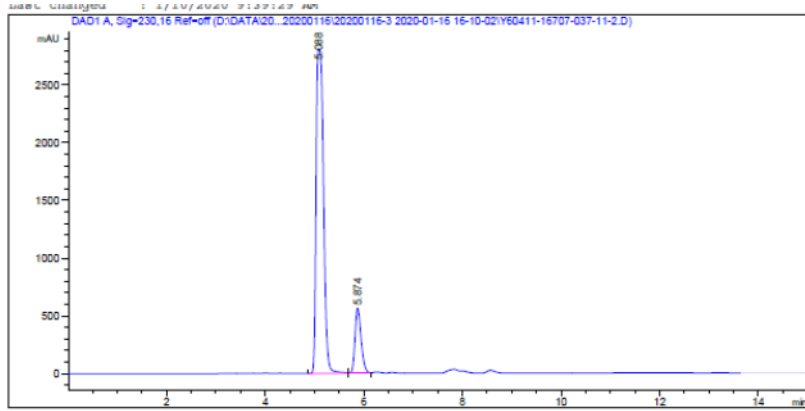

-----  
 Area Percent Report  
 -----

Sorted By : Signal  
 Multiplier : 1.0000  
 Dilution : 1.0000  
 Use Multiplier & Dilution Factor with ISTDs

Signal 1: DAD1 A, Sig=230,16 Ref-off

| Peak # | RetTime [min] | Type | Width [min] | Area [mAU*s] | Height [mAU] | Area %  |
|--------|---------------|------|-------------|--------------|--------------|---------|
| 1      | 5.088         | BV   | 0.1675      | 2.92743e4    | 2810.25854   | 85.9911 |
| 2      | 5.874         | VV   | 0.1287      | 4769.10937   | 563.50372    | 14.0089 |

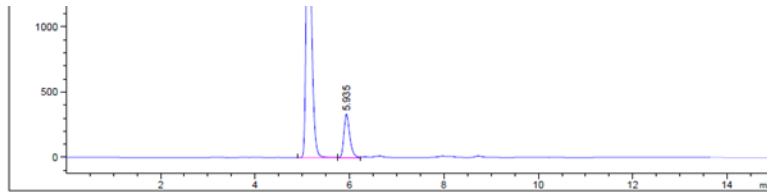

-----  
 Area Percent Report  
 -----

Sorted By : Signal  
 Multiplier : 1.0000  
 Dilution : 1.0000  
 Use Multiplier & Dilution Factor with ISTDs

Signal 1: DAD1 A, Sig=230,16 Ref-off

| Peak # | RetTime [min] | Type | Width [min] | Area [mAU*s] | Height [mAU] | Area %  |
|--------|---------------|------|-------------|--------------|--------------|---------|
| 1      | 5.130         | BB   | 0.1153      | 1.79080e4    | 2393.62915   | 86.5380 |
| 2      | 5.935         | BV   | 0.1280      | 2785.81421   | 331.78659    | 13.4620 |

Injection Volume : 2 uL  
Date Acquired : 2/20/2020 9:32:18 AM  
Date Processed : 2/20/2020 10:52:40 AM  
Column Inform : 250mm\*4.6mm 5um  
F:1ml/min T=30 Chiral-5

Acquired by : System Administrator  
Processed by : System Administrator

<Chromatogram>

mAU

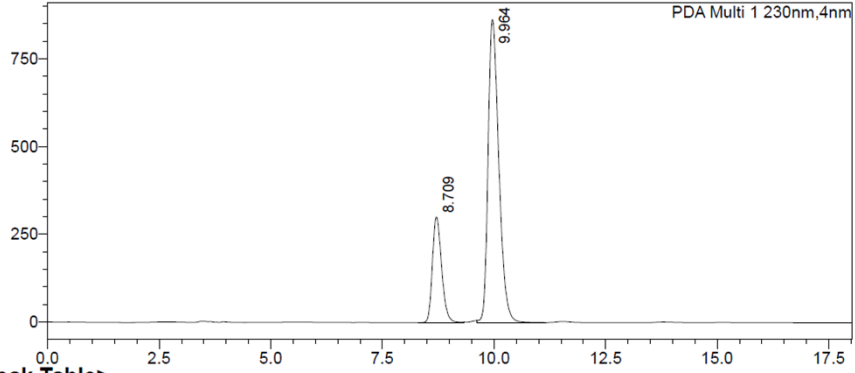

<Peak Table>

PDA Ch1 230nm

| Peak# | Ret. Time | Area     | Height  | Conc. | Mark | Area%   | Resolution(USP) |
|-------|-----------|----------|---------|-------|------|---------|-----------------|
| 1     | 8.709     | 4350829  | 301112  | 0.000 | M    | 23.105  | --              |
| 2     | 9.964     | 14479733 | 863100  | 0.000 | M    | 76.895  | 3.032           |
| Total |           | 18830562 | 1164212 |       |      | 100.000 |                 |

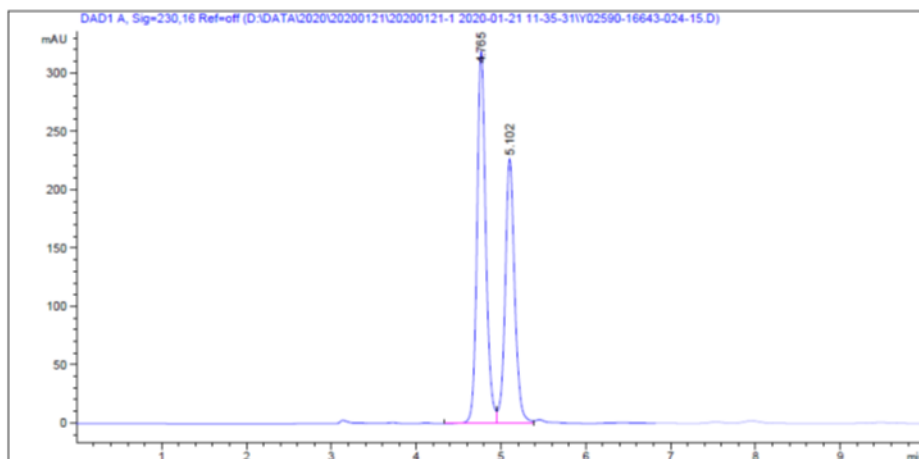

=====  
 Area Percent Report  
 =====

Sorted By : Signal  
 Multiplier : 1.0000  
 Dilution : 1.0000  
 Use Multiplier & Dilution Factor with ISTDs

Signal 1: DAD1 A, Sig=230,16 Ref=off

| Peak # | RetTime [min] | Type | Width [min] | Area [mAU*s] | Height [mAU] | Area %  |
|--------|---------------|------|-------------|--------------|--------------|---------|
| 1      | 4.765         | BV   | 0.1102      | 2306.23120   | 319.55765    | 56.4232 |
| 2      | 5.102         | VV   | 0.1195      | 1781.14673   | 227.10828    | 43.5768 |

## The chiral HPLC spectra of 8c

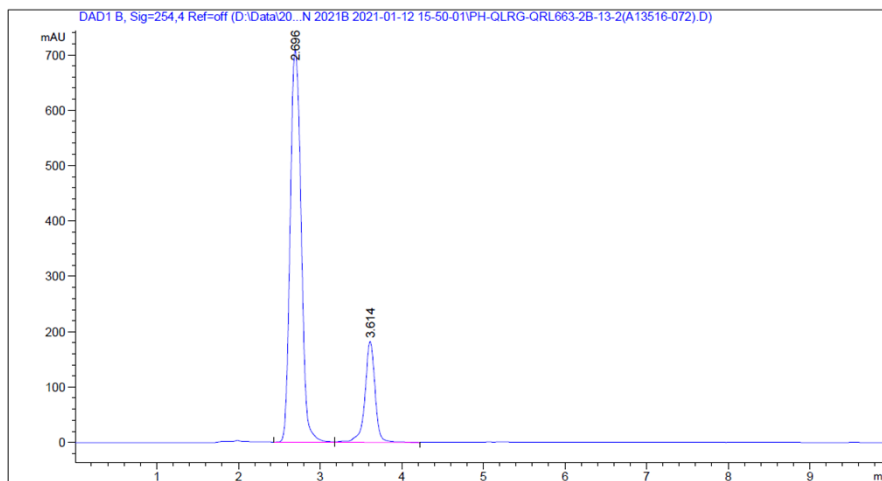

### Area Percent Report

Sorted By : Signal  
Multiplier : 1.0000  
Dilution : 1.0000  
Use Multiplier & Dilution Factor with ISTDs

Signal 1: DAD1 B, Sig=254,4 Ref=off

| Peak # | RetTime [min] | Type | Width [min] | Area [mAU*s] | Height [mAU] | Area %  |
|--------|---------------|------|-------------|--------------|--------------|---------|
| 1      | 2.696         | BV   | 0.1507      | 6592.55811   | 707.80090    | 80.7998 |
| 2      | 3.614         | VB   | 0.1304      | 1566.56580   | 182.11533    | 19.2002 |

## The chiral HPLC spectra of 8d

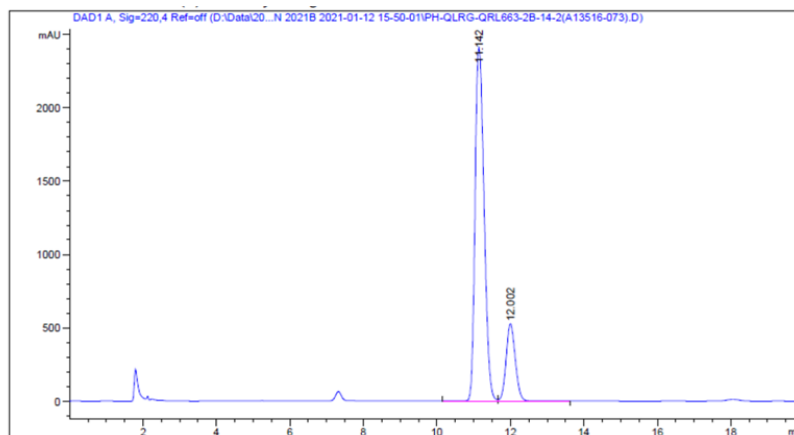

### Area Percent Report

Sorted By : Signal  
Multiplier : 1.0000  
Dilution : 1.0000  
Use Multiplier & Dilution Factor with ISTDs

Signal 1: DAD1 A, Sig=220,4 Ref=off

| Peak # | RetTime [min] | Type | Width [min] | Area [mAU*s] | Height [mAU] | Area %  |
|--------|---------------|------|-------------|--------------|--------------|---------|
| 1      | 11.142        | BV   | 0.2713      | 4.12348e4    | 2414.04663   | 81.7860 |
| 2      | 12.002        | VB   | 0.2692      | 9183.09180   | 527.29913    | 18.2140 |

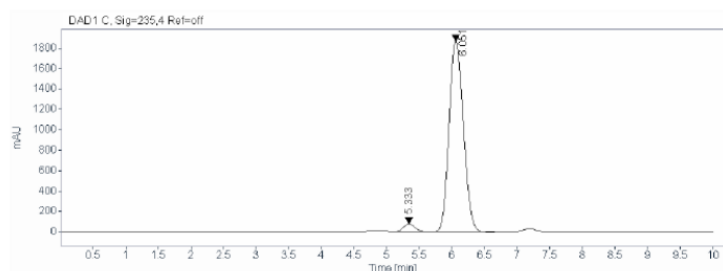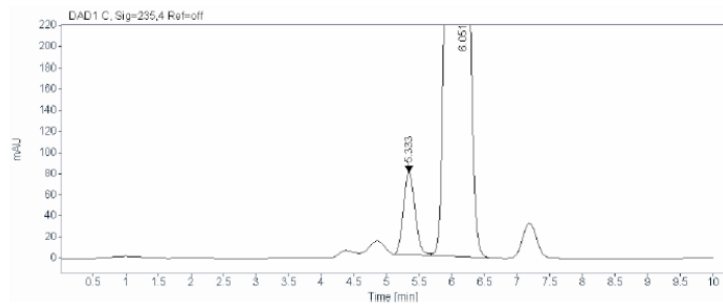

| Compound Name | RT    | Height  | Area        | Area%  | Peak Resolution USP |
|---------------|-------|---------|-------------|--------|---------------------|
|               | 5.333 | 78.27   | 974.3297    | 3.295  | 1.9570<br>3         |
|               | 6.051 | 1869.76 | 28599.6328  | 96.705 |                     |
|               | Sum   |         | 29573.96246 |        |                     |

### The chiral HPLC of 4f

### The chiral HPLC of 4g

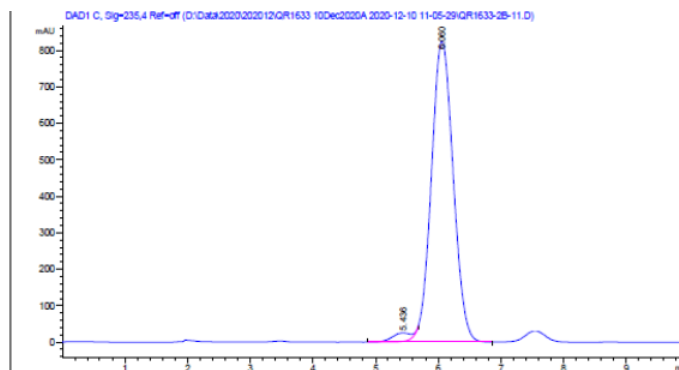

Area Percent Report

Sorted By : Signal  
Multiplier : 1.0000  
Dilution : 1.0000  
Use Multiplier & Dilution Factor with ISTDs

Signal 1: DAD1 C, Sig=235,4 Ref=off

| Peak # | RetTime [min] | Type | Width [min] | Area [mAU*s] | Height [mAU] | Area %  |
|--------|---------------|------|-------------|--------------|--------------|---------|
| 1      | 5.436         | BV E | 0.2987      | 464.01730    | 23.66582     | 2.2562  |
| 2      | 6.060         | VB R | 0.3822      | 2.01025e4    | 825.34137    | 97.7438 |



## Chiral HPLC spectra of 4h

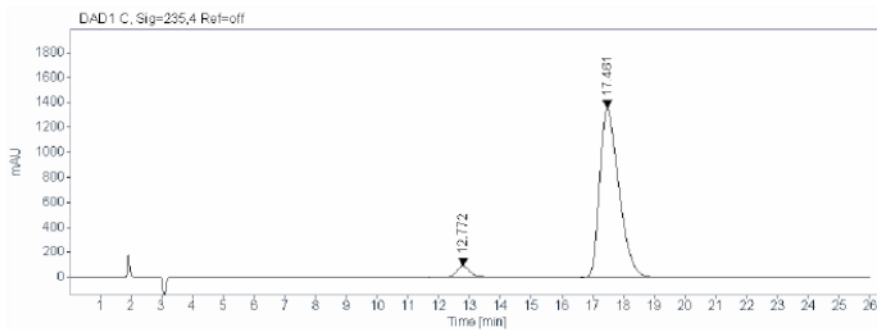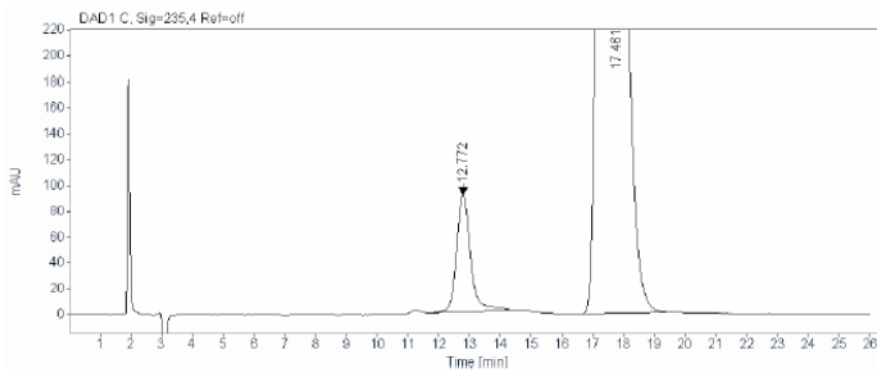

| Compound Name | RT     | Height  | Area        | Area%  | Peak Resolution USP |
|---------------|--------|---------|-------------|--------|---------------------|
|               | 12.772 | 90.72   | 2913.4082   | 4.721  |                     |
|               | 17.461 | 1357.78 | 58795.6367  | 95.279 | 4.8318              |
|               | Sum    |         | 61709.04492 |        | 6                   |
